# Supplementary material for: Deep eutectic solvent-based extraction of uranium(vi) from a wide range acidity and subsequent determination by direct loading in thermal ionization mass spectrometry
Source: Royal Society of Chemistry journal article supplement (doi:10.1039/d0ja00434k), 2021-01-01
Supplement: d0ja00434k1.pdf [file d0ja00434k1.pdf]

## Supplementary data

### **Deep eutectic solvent-based extraction of uranium(VI) from a wide range acidity and subsequent determination by direct loading in thermal ionization mass spectrometry**

Raju V. Shah<sup>a,b,\*</sup>, Ashok K. Pandey<sup>b,c</sup>, K. Sasi Bhushan<sup>a</sup>, S. Jagadish Kumar<sup>a</sup>, Radhika M. Rao<sup>a</sup>, P.G. Jaison<sup>a</sup>

<sup>a</sup>Fuel Chemistry Division, Bhabha Atomic Research Centre, Trombay, Mumbai 400 085, India

<sup>b</sup>Homi Bhabha National Institute, Anushaktinagar, Mumbai 400 094, India

<sup>c</sup>Radiochemistry Division, Bhabha Atomic Research Centre, Trombay, Mumbai 400 085, India

Table S1 :Composition of DES:

| TOPO:IA DES | Mole Fraction of TOPO | Mole Fraction of Itaconic Acid | Appearance of Mixture |
|-------------|-----------------------|--------------------------------|-----------------------|
| A           | 0.1                   | 0.9                            | Thick Gel             |
| B           | 0.3                   | 0.7                            | Highly viscous liquid |
| C           | 0.4                   | 0.6                            | Highly viscous liquid |
| D           | 0.5                   | 0.5                            | Free flowing liquid   |
| E           | 0.6                   | 0.4                            | Free flowing liquid   |
| F           | 0.8                   | 0.2                            | Highly viscous liquid |

Fig. S1.DSC thermogram of the TOPO:IA DES having 0.6:0.4 mole proportions.

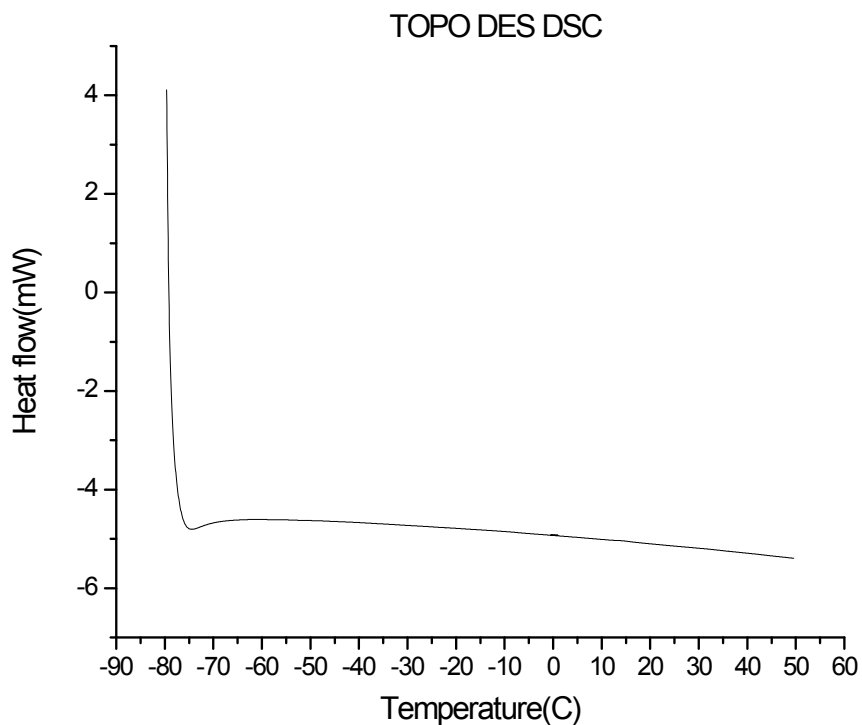

**Fig. S2.**Effect of time on extraction of Uranium.

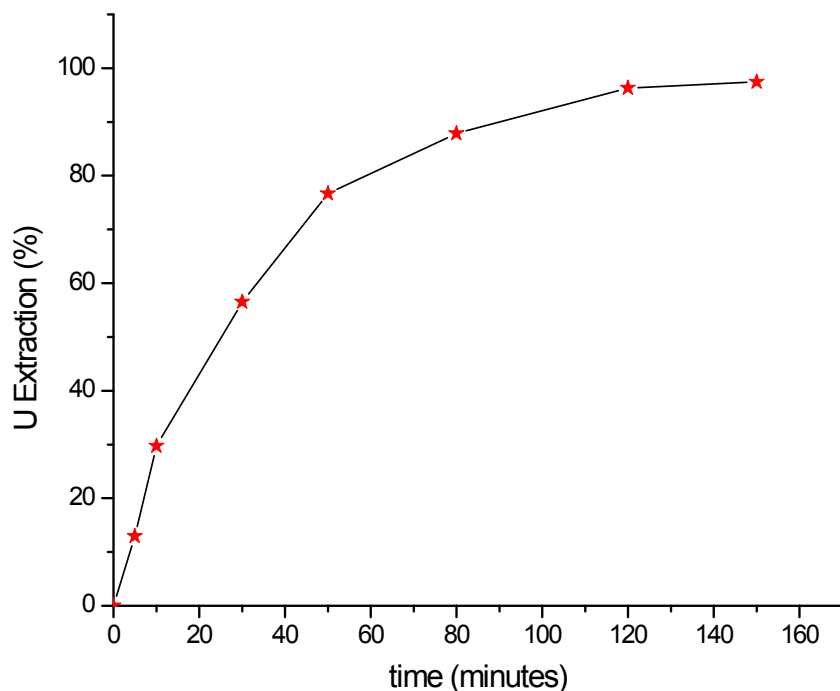

**Table S2.** Variation of extraction efficiency and distribution coefficient ( $K_d$ , mL.g<sup>-1</sup>) of U(VI) in the TOPO:IA-PP as a function pH in the equilibrating solution.

| pH | Extraction Efficiency (%) | Weight of Membrane (g) | $K_d$ (mL.g <sup>-1</sup> ) |
|----|---------------------------|------------------------|-----------------------------|
| 1  | 86                        | 0.0214                 | 2871                        |
| 3  | 87                        | 0.0186                 | 3521                        |
| 5  | 90                        | 0.0214                 | 4109                        |
| 7  | 89                        | 0.0219                 | 3608                        |
| 9  | 88                        | 0.0213                 | 3527                        |

**Chemical Structure and properties of TOPO and Itaconic Acid:**

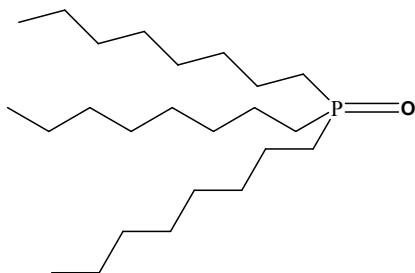

**Trioctylphosphineoxide:** Molecular Formula :  $C_{24}H_{51}OP$ ; Molar Mass: 386.635 g/mol; Density :0.861g/cm<sup>3</sup>; Melting Point : 50-55°C; Solubility in water: Insoluble.

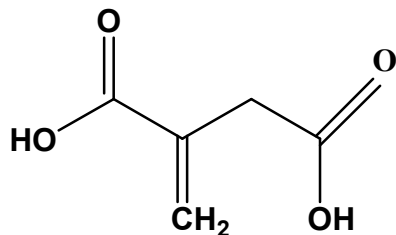

**Itaconic Acid (methylidenesuccinic acid):** Molecular Formula:  $C_5H_6O_4$ ; Molar Mass: 128.084 g/mol; Melting Point: 166-167 °C; Solubility in water: 1 g/12 mL.

**Synthetic ground water was prepared as per composition mentioned in reference.<sup>28</sup>**

| Chemical Constituent          | Concentration(mg/L) |
|-------------------------------|---------------------|
| pH (units)                    | 8.1                 |
| Ca <sup>2+</sup>              | 35                  |
| Mg <sup>2+</sup>              | 80                  |
| Na <sup>+</sup>               | 740                 |
| K <sup>+</sup>                | 7                   |
| CO <sub>3</sub> <sup>2-</sup> | 25                  |
| HCO <sub>3</sub> <sup>-</sup> | 435                 |
| Cl <sup>-</sup>               | 1015                |
| SO <sub>4</sub> <sup>2-</sup> | 185                 |
| NO <sub>3</sub> <sup>-</sup>  | 29                  |
| F <sup>-</sup>                | 1                   |

**Synthetic urine was prepared as per composition mentioned in reference.<sup>29</sup>**

### **Composition of synthetic urine sample**

| <b>Chemical Constituent</b>     | <b>Concentration (g L<sup>-1</sup>)</b> |
|---------------------------------|-----------------------------------------|
| pH (units)                      | 6                                       |
| Urea                            | 20                                      |
| NaCl                            | 6.3                                     |
| K <sub>2</sub> HPO <sub>4</sub> | 4.9                                     |
| MgCl <sub>2</sub> anhydrous     | 0.35                                    |
| CaCl <sub>2</sub> dihydrate     | 0.43                                    |
| Citric acid monohydrate         | 1.0                                     |

### **Composition of Seawater**

U concentration =  $1.4 \times 10^{-8}$  mol/L (3.3 mg/m<sup>3</sup>). pH = 7.5-8.5,

*Salt conc.:* [NaCl] = 0.55 mol/L, [HCO<sub>3</sub><sup>-</sup>] = 2.5 mmol/L, [SO<sub>4</sub><sup>2-</sup>] = 27 mmol/L Na=10770 ppm, Mg = 1290 ppm,

Ca = 412 ppm,

K = 380 ppm

Si, Li, Rb, I, Ba, Mo = 2-0.01 ppm,

As, U, V, Ti, Fe = 0.004 - 0.001 ppm

Zn, Ni, Al, Cs, Cr, Sb, Se, Mn, Cu, W = 0.0005-0.0001 ppm
